# Supplementary material for: Newcastle disease virus NP and P proteins induce autophagy via the endoplasmic reticulum stress-related unfolded protein response
Source: PubMed Central journal article supplement (PMC4838823; doi:10.1038/srep24721), 2016-04-21
Supplement: srep24721-s1.pdf [file srep24721-s1.pdf]

**Newcastle disease virus NP and P proteins induce autophagy via the  
endoplasmic reticulum stress-related unfolded protein response**

Jing-Hua Cheng<sup>1,2</sup>, Ying-Jie Sun<sup>1</sup>, Fan-Qing Zhang<sup>1,3</sup>, Xiao-Rong Zhang<sup>2</sup>, Xv-Sheng Qiu<sup>1</sup>, Li-Ping Yu<sup>2</sup>, Yantao Wu<sup>2,\*</sup>, Chan Ding<sup>1,\*</sup>

**Supplementary Figures**

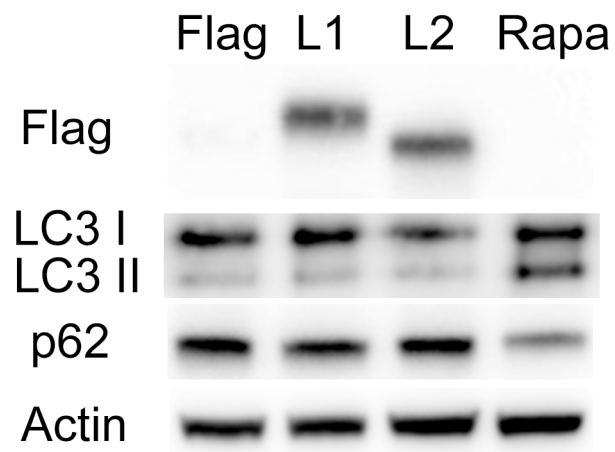

**Figure S1. Separate L protein could not induce autophagy in A549 cells.** A549 cells were transfected with two Separate L-expressing plasmids. Cells treated with rapamycin for 24 h were used as a positive control. At 24 h post-transfection, cells were harvested and LC3-II, p62 and  $\beta$ -actin were analyzed by western blotting.

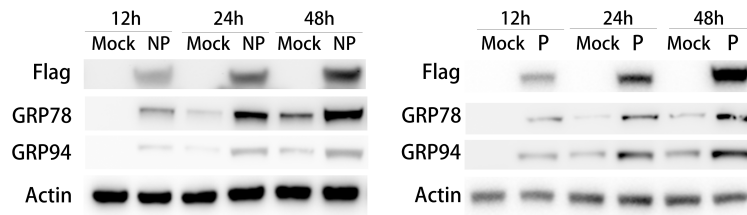

**Figure S2.ER Stress is induced in NDV-infected or NDV NP- or P-expressing cells from 12 to 48 h.** A549 cells were transfected with NDV P- or NP- plasmids for 12, 24, and 48 h, The GRP78, GRP94,  $\beta$ -actin as well as the NDV viral protein levels were analyzed by western blot assay at indicated time points post-transfection.

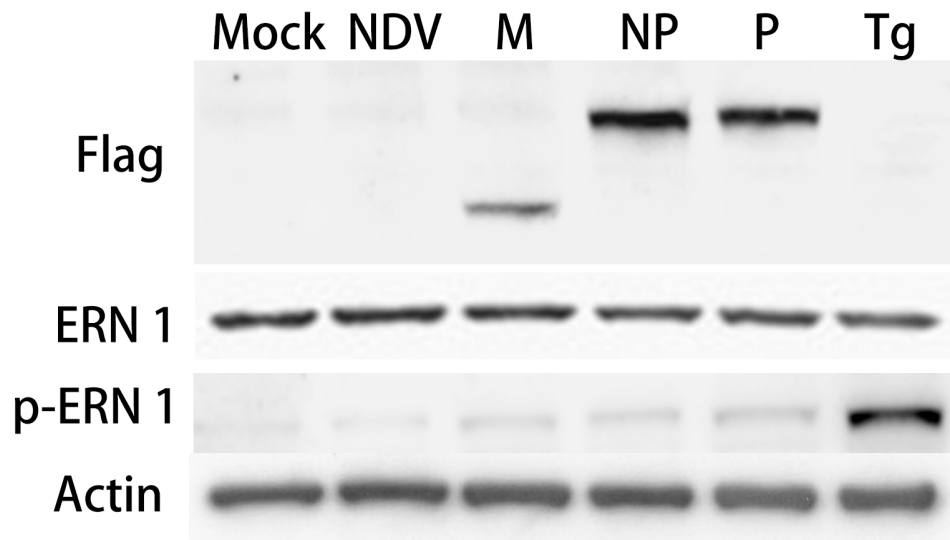

**Figure S3. IRE 1 pathway was slightly activated during NDV infection but not NDV protein transfection.** A549 cells were transfected with NDV NP, P or M plasmids, infected with NDV at an MOI of 1, or treated with 300 nM Tg for 24 h were harvested for Western blotting analysis of ERN1, p-ERIN1,  $\beta$ -actin and NDV viral protein levels

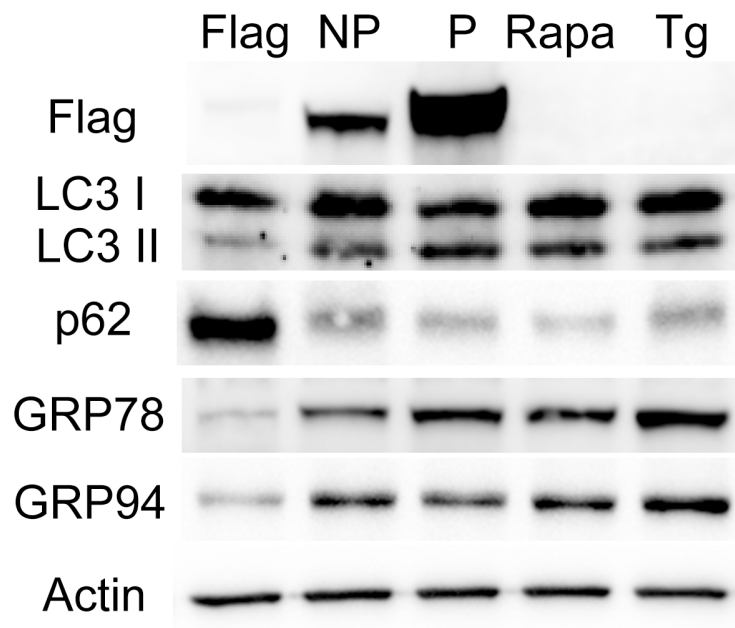

**Figure S4. Autophagy and ER Stress is induced by NP or P protein from the lentogenic strain.** A549 cells were transfected with NDV NP- or P- plasmids from lentogenic strain for 24 h. The LC3-II, p62, GRP78, GRP94 and  $\beta$ -actin were analyzed by western blot assay.
